# Supplementary material
Source: PubMed Central journal article supplement (PMC4141996)
Supplement: supp_WNL.0000000000000688_Coinvestigators.pdf [file supp_WNL.0000000000000688_Coinvestigators.pdf]

## **COINVESTIGATORS**

### **Scottish Audit of Intracranial Vascular Malformations Steering Committee (SAIVMS)**

R. Al-Shahi Salman, PhD, FRCP Edin (NHS Lothian, SAIVMs steering committee member); D. Beard, RGN (NHS National Services Scotland, SAIVMs steering committee member); J. J. Bhattacharya, FRCR (NHS Greater Glasgow and Clyde, SAIVMs steering committee member); C. Counsell, MD, MRCP(UK) (NHS Grampian, SAIVMs steering committee member); E. Jerome St. George, FRCS(SN) (NHS Greater Glasgow and Clyde, SAIVMs steering committee member); V. Ritchie, MB, ChB (retired, NHS Lothian, SAIVMs steering committee member); R. C. Roberts, DPhil (retired, NHS Tayside, SAIVMs steering committee member); R. J. Sellar, FRCR (retired, NHS Lothian, SAIVMs steering committee member); and C. P. Warlow, FRCP Edin (retired, NHS Lothian, SAIVMs steering committee member).

### **Columbia University, New York, NY, USA**

J. H. Choi, MD (coinvestigator); E. Sander Connolly, MD (coinvestigator); A. V. Khaw, MD (coinvestigator); H. Mast, MD (coinvestigator); J. P. Mohr, MD (principal investigator); J. Pile-Spellman, MD (coinvestigator); R. R. Sciacca, EngScD (coinvestigator); C. Stapf, MD (coinvestigator).

### **Kaiser Permanente of Northern California, Division of Research, Oakland, CA, USA**

S. Sidney, MD, MPH (coinvestigator); J. G. Zaroff, MD (coinvestigator).

### **University of California, San Francisco, San Francisco, CA, USA**

D. Cooke, MD (clinical collaborator); C. F. Dowd, MD (clinical collaborator); H. Fullerton, MD (clinical collaborator); N. Gupta, MD, PhD (clinical collaborator); V. Halbach, MD (clinical collaborator); C. Hess, MD (coinvestigator); S. W. Hetts, MD (clinical collaborator); R. T. Higashida, MD (clinical collaborator); S. C. Johnston, MD, PhD (clinical collaborator); A. Josephson, MD (clinical collaborator); A. Kim, MD (clinical collaborator); H. Kim, MPH, PhD (principal investigator); N. U. Ko, MD (coinvestigator); M. T. Lawton, MD (coinvestigator); C. E. McCulloch, PhD (coinvestigator); M. McDermott, MD (clinical collaborator); L. Pawlikowska, PhD (coinvestigator); D. Saloner, PhD (coinvestigator); V. Singh, MD (clinical collaborator); W. Smith, MD (clinical collaborator); T. Tihan, MD, PhD (coinvestigator); W. L. Young, MD (former principal investigator)

### **MARS Writing Committee**

H. Kim, PhD (co-chair); R. Al-Shahi Salman, PhD, FRCP Edin (co-chair); C. E. McCulloch, PhD (member); C. Stapf, MD (member); W. L. Young, MD (member); for the MARS coinvestigators
