# Supplementary material
Source: PubMed Central journal article supplement (PMC4141996)
Supplement: supp_WNL.0000000000000688_SupplData.pdf [file supp_WNL.0000000000000688_SupplData.pdf]

## SUPPLEMENTAL DATA

**Table e-1 Codebook for variables extracted from each MARS cohort**

| Description                           | Method                                                          | Range                   | Units       | Notes                                                                                                                                                                |
|---------------------------------------|-----------------------------------------------------------------|-------------------------|-------------|----------------------------------------------------------------------------------------------------------------------------------------------------------------------|
| Unique patient identifier             | Assigned after merging                                          |                         |             |                                                                                                                                                                      |
| Unique patient ID                     | Assigned by each site                                           |                         |             |                                                                                                                                                                      |
| Cohort identifier                     | Assigned                                                        | UCSF, COL, KPNC, SIVMS  |             |                                                                                                                                                                      |
| Patient age at diagnostic event       | History                                                         | 0–99                    | Decades     |                                                                                                                                                                      |
| Sex                                   | Physical Exam                                                   | M / F                   |             |                                                                                                                                                                      |
| Race/ethnicity                        | History                                                         |                         |             | per NIH reporting style                                                                                                                                              |
| Hemorrhage at initial presentation    | CT/MRI evidence of fresh bleeding into parenchyma or CSF spaces | Yes/No                  |             | Hierarchical according to Joint Writing Group. Aneurysmal SAH not differentiated from AVM hemorrhage                                                                 |
| Seizure at initial presentation       | History                                                         | Yes/No                  |             |                                                                                                                                                                      |
| Headache at initial presentation      | History                                                         | Yes/No                  |             |                                                                                                                                                                      |
| Focal deficit at initial presentation | History/ Physical Exam                                          | Yes/No                  |             |                                                                                                                                                                      |
| Asymptomatic at initial presentation  | History                                                         | Yes/No                  |             |                                                                                                                                                                      |
| AVM surgical resection                | History                                                         | Yes/No                  |             |                                                                                                                                                                      |
| AVM endovascular therapy              | History                                                         | Yes/No                  |             |                                                                                                                                                                      |
| AVM radiosurgery                      | History                                                         | Yes/No                  |             |                                                                                                                                                                      |
| Non-interventional management         | History                                                         | Yes/No                  |             |                                                                                                                                                                      |
| Maximum AVM size                      | Angiogram or MRI                                                | >0                      | centimeters |                                                                                                                                                                      |
| Venous Drainage pattern               | Angiogram                                                       | Superficial; Deep; Both |             |                                                                                                                                                                      |
| Any lobar location                    | Angiogram or MRI                                                | Yes/No                  |             |                                                                                                                                                                      |
| Any infratentorial location           | Angiogram or MRI                                                | Yes/No                  |             |                                                                                                                                                                      |
| AVM side                              | Angiogram or MRI                                                | Yes/No                  |             |                                                                                                                                                                      |
| Any arterial AVM-related aneurysm     | Angiogram or MRI                                                | Yes/No                  |             | Includes proximal and distal flow-related aneurysm and intranidal aneurysms                                                                                          |
| Spetzler–Martin surgical risk grade   | Derived                                                         | I, II, III, IV, V       |             | Sum of AVM size (small =1(<3cm), medium=2 (>= 3 and <= 6 cm), large=3 (>6 cm)), + eloquence (no=0, yes=1), + venous drainage (superficial only=0, any deep=1).       |
| Event time                            | Derived                                                         | >0                      | days        | Time to event for Kaplan Meier analysis; numbers of days between diagnosis and event or censoring; in days because some patients will have very short follow up time |

|                                                                      |         |        |  |                                                                                                                                                                              |
|----------------------------------------------------------------------|---------|--------|--|------------------------------------------------------------------------------------------------------------------------------------------------------------------------------|
| New hemorrhage after diagnosis K-M Survival Analysis Censor Variable | Derived | Yes/No |  | K-M Survival Analysis Censor Variable. Censor date is (a) any AVM treatment; (b) last follow-up; (c) death; Hem on same date as tx is censored and NOT treated as new event. |
| Death after diagnosis K-M Survival Analysis Censor Variable          |         | Yes/No |  | Time to event for Kaplan Meier analysis; numbers of days between diagnosis and death                                                                                         |

**Table e-4. Annual hemorrhage rates per 100 patient-years based on different truncated survival times for all AVMs and by rupture status at presentation**

| Survival time | Overall    |               |              | Ruptured   |               |               | Unruptured |               |              |
|---------------|------------|---------------|--------------|------------|---------------|---------------|------------|---------------|--------------|
|               | ICH Events | Rate per year | 95% CI       | ICH Events | Rate per year | 95% CI        | ICH Events | Rate per year | 95% CI       |
| 10 years      | 141        | 2.32          | (1.97, 2.74) | 85         | 4.80          | (3.88, 5.94)  | 56         | 1.30          | (1.00, 1.69) |
| 5 years       | 109        | 2.73          | (2.27, 3.30) | 68         | 5.85          | (4.61, 7.42)  | 41         | 1.45          | (1.07, 1.97) |
| 2 years       | 72         | 5.25          | (4.17, 6.62) | 47         | 10.73         | (8.06, 14.29) | 25         | 2.68          | (1.81, 3.97) |
| 1 year        | 57         | 4.40          | (3.39, 5.71) | 40         | 9.76          | (7.16, 13.31) | 17         | 1.92          | (1.19, 3.09) |

Our data suggest that hemorrhage events are more likely to occur in a short window after presentation rather than at a later time, reflected by the higher hemorrhage rates in the 1 and 2 year analyses and lower rates in the 5 and 10 year analyses.

**Table e-5 Risk of hemorrhage in the natural history course by age category**

| Age category | No. (%) in age category | No. (%) of ICH events | No. (%) Treated | Follow-up (yrs) | Adjusted HR | 95% CI       | p-value |
|--------------|-------------------------|-----------------------|-----------------|-----------------|-------------|--------------|---------|
| 0-20 years   | 538 (21%)               | 25 (5%)               | 385 (72%)       | 2.53            | Reference   |              |         |
| 21-40 years  | 953 (38%)               | 48 (5%)               | 651 (68%)       | 2.32            | 1.97        | 0.98 – 3.98  | 0.058   |
| 41-60 years  | 777 (31%)               | 44 (6%)               | 500 (64%)       | 2.22            | 3.93        | 1.89 – 8.19  | <0.001  |
| 61+ years    | 256 (10%)               | 23 (9%)               | 100 (39%)       | 3.05            | 6.17        | 2.61 – 14.61 | <0.001  |

We assessed hemorrhage risk in the natural history course by age category, grouping patients into children (0-20 years), young adults (21-40 years), middle-aged adults (41-60 years) and older adults (61+ years). Children make up a large proportion of the cohort (21%) and their average follow-up time, while less than that of older adults, is not profoundly so. Compared to children, the effect of age is monotonically increasing across all successive age categories. Thus, these results provide additional justification for modeling age as a continuous variable in our paper.

**Figure e-1 Kaplan-Meier survival curves for new hemorrhage in untreated brain AVM patients, by clinical characteristics**

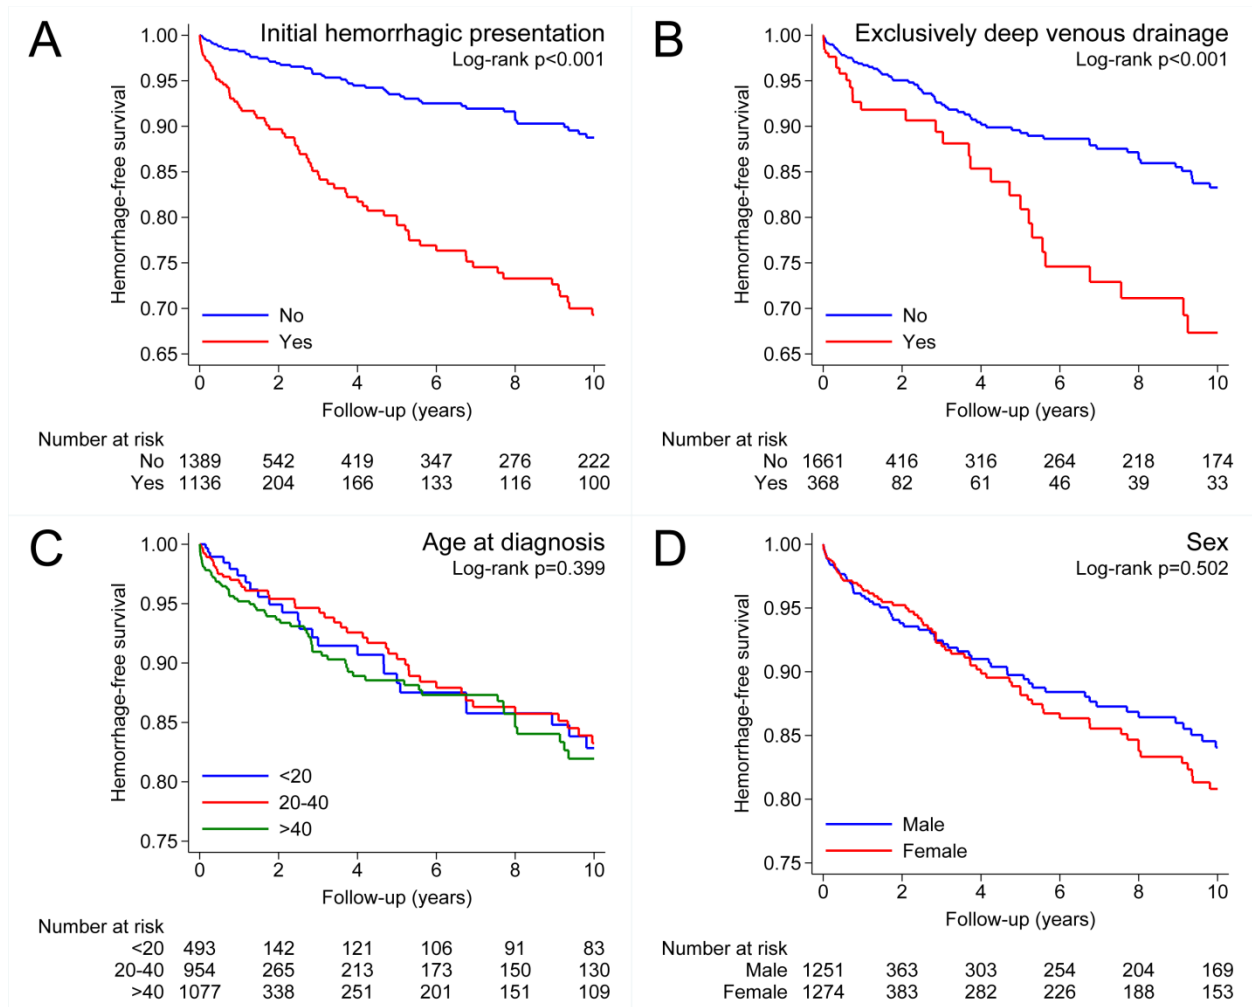

(A) Initial hemorrhagic presentation; (B) Exclusively deep venous drainage; (C) Age at diagnosis; (D) Sex. The y-axis shows the proportion of subjects who remain hemorrhage-free. The x-axis shows follow-up time after AVM diagnosis in years. The table below shows the number at risk at each follow-up time interval.

**Figure e-2 Hemorrhage-free survival curves stratifying predicted probabilities of hemorrhage risk into low, intermediate and high**

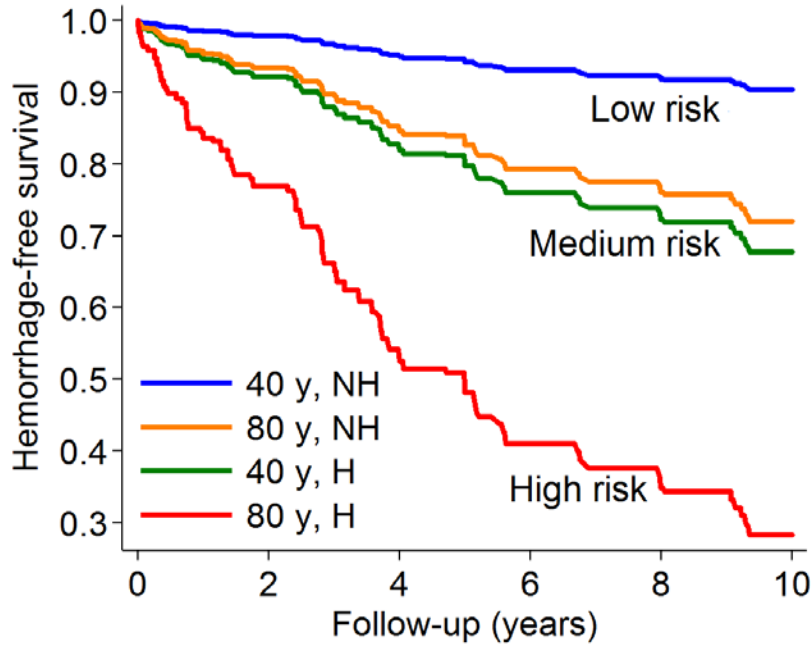

y = years old at diagnosis; NH = no hemorrhage at presentation; H = hemorrhage at presentation

Once a risk prediction model has been validated in external cohorts, the clinical utility of the model can be assessed. A good prediction model will be able to stratify patients into low, intermediate, and high risk.

Using our Model A estimates, we calculated the predicted probability of hemorrhage in the natural untreated course of AVM patients for various scenarios. The predicted probabilities of hemorrhage are calculated using the following formula:

$$1 - \hat{S}_i(t) = 1 - \hat{S}_0(t)^{\exp(x_i'\hat{\beta})},$$

where  $\hat{S}_0(t)$  is the baseline survivor function at time  $t$  and  $x_i'\hat{\beta}$  is the vector of covariates multiplied by the corresponding model coefficients (i.e., the log of the hazard ratios). For our model A, this equates to:

$$\text{predicted probability of event} = 1 - (\text{baseline survival at time } t)^{\exp\{0.294 \times A + 0.395 \times G + 1.349 \times P + 0.468 \times V + 0.018 \times S\}},$$

where A is the age at diagnosis in decades, G is gender (1=female, 0=male), P is presentation (1=hemorrhagic, 0=other), V is venous drainage pattern (1=exclusively deep, 0=other), and S is AVM size in cm. The baseline survival estimates are derived by a weighted average of the baseline estimates from the four MARS cohorts, which are given below in the Table.

| <b>Time since Diagnosis</b> | <b>Weighted Average of Baseline Survival</b> |
|-----------------------------|----------------------------------------------|
| 1 year                      | 0.99584                                      |
| 5 years                     | 0.98301                                      |
| 10 years                    | 0.97087                                      |

For example, we compared the predicted risk for an 80-year-old male to a 40-year-old male with the following AVM characteristics: unruptured at presentation, 3 cm AVM nidus, and not exclusively deep venous drainage. This corresponds to probability of hemorrhage of 4.5% at 1 year, 17.3% at 5 years, and 27.9% at 10 years for the 80-year-old male. On the other hand, the predicted probability of hemorrhage for a 40-year-old male with similar AVM characteristics is much lower: 1.4% at 1 year, 5.6% at 5 years, and 9.6% at 10 years. This can be better seen in the Figure, showing good separation of survival curves into low, intermediate and high risk for risk stratification purposes. Thus, in this example, the 80-year-old male who has an unruptured AVM has a similar hemorrhage risk to a 40-year-old male who presents with a ruptured AVM, keeping all else constant.
